# Supplementary material
Source: ML conference proceedings conference paper supplement (https://openreview.net/forum?id=PcO5a4fyE5)
Supplement: supplementary_material [file attachment]

Cartpole

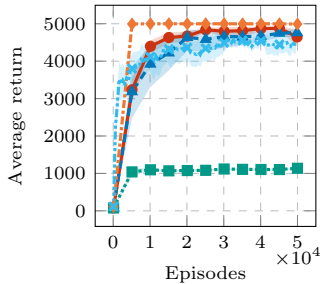

Inverted Double Pendulum

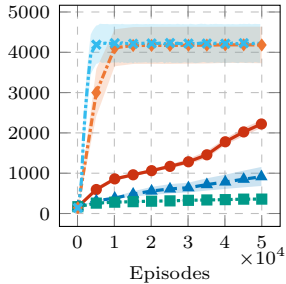

Mountain Car

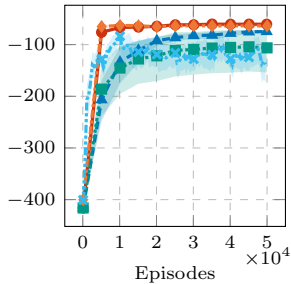

Swimmer

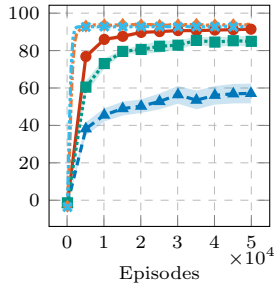

—●— AB-MBPExPI    - - - × - - - PB-MBPExPI    - - - ▲ - - - AB-POIS    - - - ◆ - - - PB-POIS    ···■··· TRPO
