# Supplementary material
Source: ML conference proceedings conference paper supplement (https://openreview.net/forum?id=PcO5a4fyE5)

$n = 50$ 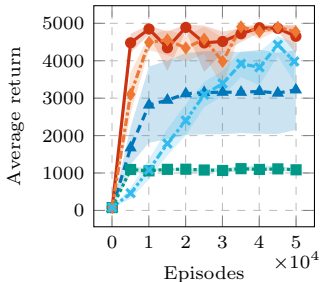 $n = 11$ 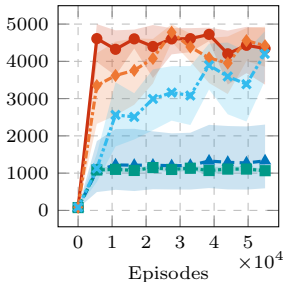—●— AB-MBPE<sub>x</sub>PI ( $J = 1$ )- - ♦ - - AB-MBPE<sub>x</sub>PI ( $J = 2$ )- - × - - AB-MBPE<sub>x</sub>PI ( $J = 10$ )

- - ▲ - - AB-POIS

- - ■ - - TRPO

Supplement: supplementary_material [file attachment]

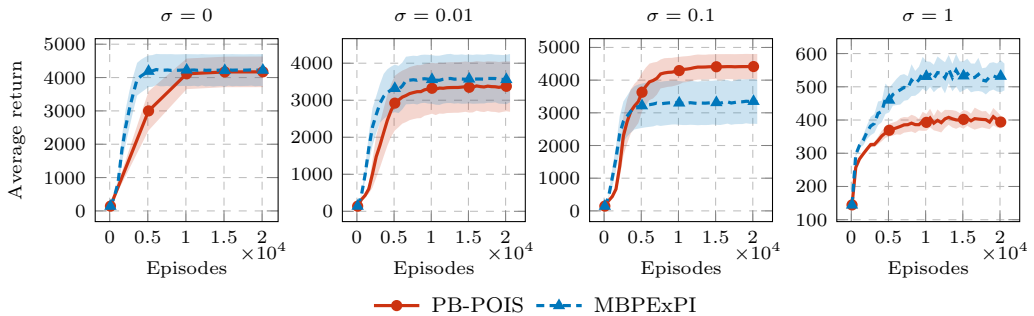

Supplement: supplementary_material [file attachment]

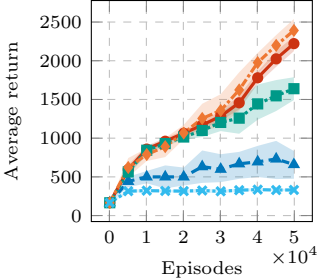

$\beta = 1$        $\beta = 0.1$

$\beta = 0.5$        $\beta = 2$        $\beta = 4$

Supplement: supplementary_material [file attachment]

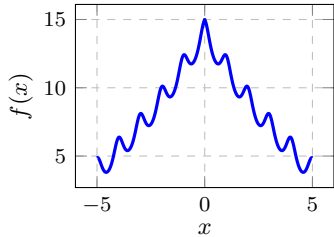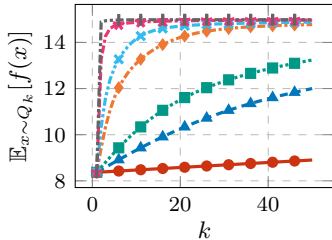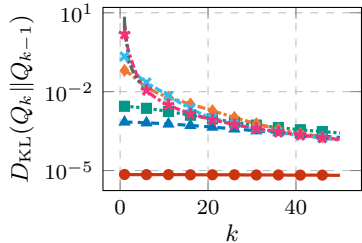

—●—  $\beta = 0.01$     -▲-  $\beta = 0.1$     ...■...  $\beta = 0.2$     -◆-  $\beta = 1$     -×-  $\beta = 2$     -\*-  $\beta = 10$     -|-  $\beta = 100$

Supplement: supplementary_material [file attachment]
